# Supplementary material for: Growth Strategies of Tropical Tree Species: Disentangling Light and Size Effects
Source: PLOS journal article supplement (doi:10.1371/journal.pone.0025330), 2011-09-22
Supplement: S1 (10.1371/journal.pone.0025330.s001) [file journal.pone.0025330.s001]

**Figure S1**

**Diameter-light relationship**

(A) Light estimate vs. tree diameter

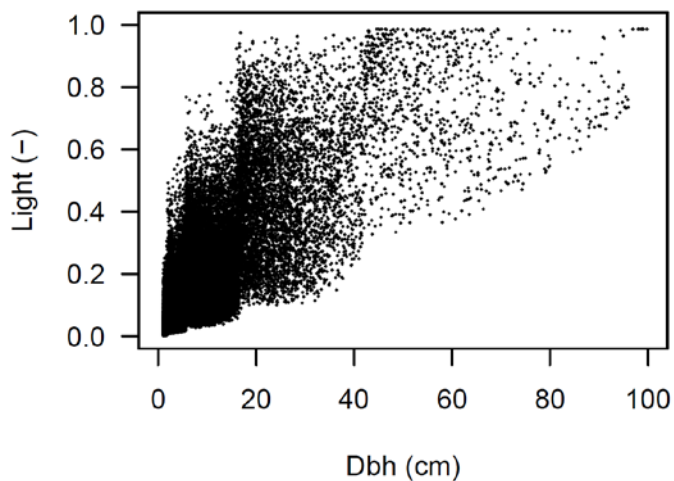

Light estimate vs. tree diameter (dbh) for 148 933 trees at Barro Colorado Island, Panama, in 1990. Trees with dbh > 1 m are assumed to receive full sunlight and are not shown.

(B) Nonlinear regression estimating average tree dbh for light levels between 2 and 20%

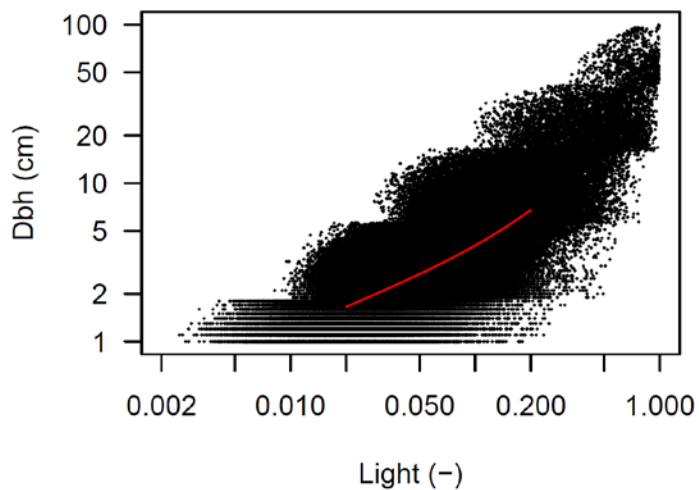

Nonlinear regression predicting average  $\log(\text{dbh})$  in the light range from 2 to 20% ( $\log(\text{dbh}) = 4.547 + 0.455 \log(\text{light}) + 2.006 \text{ light}$ ; dbh is in mm). Average  $\log(\text{dbh})$  is used to estimate average growth across the light range for Fig. 4 of the main manuscript.
