# Supplementary material for: Growth Strategies of Tropical Tree Species: Disentangling Light and Size Effects
Source: PLoS One. 2011 Sep 22;6(9):e25330. doi: 10.1371/journal.pone.0025330 (PMC3178650; doi:10.1371/journal.pone.0025330)
Supplement: Table S2 — Observed and predicted average growth rate for tree species with <25 individuals at Barro Colorado Island, Panama. N is the number of individuals. (XLSX) [file pone.0025330.s005.xlsx]

## Sheet: raresp_table
Table S2: Observed and predicted growth rate for tree species with <25 individuals at Barro Colorado Island,
Panama. N is the number of individuals.
Species	1985−1990			1990−1995
	Mean growth (mm/yr)		N	Mean growth (mm/yr)		N
	Observed	Predicted		Observed	Predicted
Abarema macradenia	22.88	15.8	1	20.7	15.93	1
Acacia melanoceras	1.2	1.78	4	1.01	1.18	8
Acalypha macrostachya	2.05	2.53	7	1.36	1.58	5
Alchornea latifolia	-	-	-	0.41	0.49	1
Amaioua corymbosa	0.7	0.63	13	1.22	1.4	11
Anacardium excelsum	8.32	5.08	12	5.39	6.22	11
Apeiba tibourbou	8.69	4.68	18	5.5	6.87	19
Aphelandra sinclairiana	1.61	2.32	3	0.98	1.66	4
Appunia seibertii	-	-	-	0.21	0.42	2
Ardisia guianensis	0.14	0.81	7	0.59	1.05	8
Banara guianensis	-	-	-	9.25	5.86	2
Brosimum guianense	1.02	2.57	3	0.14	1.1	3
Casearia commersoniana	1.44	1.69	12	0.23	0.57	11
Casearia guianensis	0.7	1.26	9	0.31	0.63	11
Cavanillesia platanifolia	12.63	12.01	18	9.42	10.86	12
Cecropia obtusifolia	14.63	9.21	14	10.54	9.23	20
Cedrela odorata	13.33	7.62	1	1.27	1.9	4
Ceiba pentandra	-	-	-	10.21	9.77	19
Cespedesia spathulata	0	0.84	1	-0.21	0.26	1
Chimarrhis parviflora	2.29	2.85	3	2.35	2.61	3
Cojoba rufescens	1.86	2.11	1	0.84	1.4	1
Colubrina glandulosa	3.28	7.35	1	-	-	-
Coutarea hexandra	2.47	1.81	2	2.89	2.49	2
Cupania cinerea	1.23	1.92	5	0.83	1.11	8
Elaeis oleifera	13.9	8.33	7	0.78	2.06	5
Enterolobium schomburgkii	1.16	2.04	12	2.46	2.89	11
Ficus bullenei	2.14	4.22	1	-	-	-
Ficus citrifolia	-	-	-	0	0.71	1
Ficus colubrinae	-0.59	3.73	1	0.41	3.28	1
Ficus insipida	18.5	8.63	2	2.67	3.79	3
Ficus maxima	2.84	3.58	4	7.23	5.02	5
Ficus obtusifolia	11.09	13.68	1	2.81	6.84	1
Ficus popenoei	8.16	2.87	3	5.85	5.48	3
Ficus tonduzii	-	-	-	0.98	0.93	21
Ficus trigonata	12.13	15.11	2	16.42	14.1	3
Ficus yoponensis	8.16	4.62	2	5.54	8.35	1
Guazuma ulmifolia	-	-	-	7.61	9.74	22
Hamelia axillaris	0.94	0.8	22	-	-	-
Hamelia patens	2.42	3.6	2	0.83	2.51	1
Hampea appendiculata	8.52	7.2	22	8.24	9.12	15
Inga mucuna	-0.99	2.12	1	0.82	2.4	1
Inga oerstediana	5.11	6.05	4	6.83	3.95	4
Inga punctata	3.36	3.38	11	10.52	9.03	13
Inga ruiziana	0.31	0.64	10	0.86	1.38	8
Inga spectabilis	4.12	4.37	16	5.48	5.88	16
Koanophyllon wetmorei	1.86	2.76	5	0.24	0.76	6
Laetia procera	4	4.55	20	4.73	5.16	22
Lafoensia punicifolia	6.15	6.02	7	5.72	6.75	6
Lindackeria laurina	-	-	-	0.66	0.95	20
Lozania pittieri	0.47	1.47	2	-0.21	0.55	1
Maclura tinctoria	7.8	10.88	1	11.45	9.38	1
Margaritaria nobilis	4.52	4.55	4	4.47	5.25	3
Marila laxiflora	0.79	3.49	1	0	1.79	1
Miconia elata	1.09	1.75	16	0.2	0.44	16
Miconia hondurensis	2.25	2.52	17	1.63	1.98	22
Miconia impetiolaris	1.19	1.9	4	0.3	0.62	5
Miconia prasina	-	-	-	6.37	3.81	2
Myrospermum frutescens	0.24	0.71	13	0.72	0.97	10
Nectandra fuzzy	4.11	3.97	3	6.01	3	1
Nectandra purpurea	1.09	1.65	20	-	-	-
Ochroma pyramidale	21.9	22.59	5	14.61	17.21	5
Ormosia amazonica	1.22	2.32	2	0	0.49	1
Pachira quinata	-	-	-	16.19	12.52	1
Pachira sessilis	0.48	1.03	20	1.11	1.17	18
Piper aequale	0	0.4	12	0.16	0.4	9
Piper arboreum	0.45	1	8	0	0.66	4
Piper colonense	0.37	1.07	8	0.86	1.28	6
Piper perlasense	0.05	0.26	21	-0.03	0.2	12
Pourouma bicolor	3.1	3.96	23	4.11	4.45	24
Pouteria fossicola	5.38	9.23	1	5.96	8.77	1
Protium confusum	2.75	3.67	2	0.84	1.42	3
Pseudobombax septenatum	6.14	7.33	5	3.58	3.73	8
Psychotria acuminata	-	-	-	0.31	0.89	2
Psychotria chagrensis	0.23	0.69	4	0	0.41	2
Psychotria deflexa	-	-	-	0.15	0.36	16
Psychotria graciliflora	0.96	1.28	6	0.41	0.62	21
Psychotria limonensis	0	0.56	2	-0.06	0.38	4
Psychotria pittieri	0	0.95	1	0.1	0.62	2
Pterocarpus officinalis	0.57	1.24	4	0.14	0.94	3
Rosenbergiodendron formosum	1.92	2.49	2	0.73	1.37	2
Sapium broadleaf	4.34	6.33	2	4.02	5.48	3
Sapium glandulosum	1.76	2.38	20	2.26	2.33	20
Schizolobium parahyba	2.53	2.66	10	2.01	2.13	12
Siparuna guianensis	3.04	2.93	3	1.39	1.92	5
Solanum asperum	-	-	-	5.58	4.77	1
Solanum circinatum	6.66	4.87	1	-	-	-
Solanum hayesii	3.05	3.76	23	4.71	4.79	17
Solanum steyermarkii	11.68	4.34	1	-	-	-
Tetrathylacium johansenii	13.49	13.9	2	4.78	8.07	2
Theobroma cacao	0.84	1.36	7	0.59	0.95	5
Tocoyena pittieri	1.52	2.75	5	1.39	2.41	5
Trema micrantha	18.77	20.58	7	18.33	19.78	9
Trichanthera gigantea	0	2.15	1	1.92	2.53	1
Trichospermum galeottii	3.5	8.32	1	33.34	16.34	1
Urera baccifera	-	-	-	0.83	1.47	1
Vismia billbergiana	0.94	2.77	2	0.65	2.78	1
Vochysia ferruginea	2.72	2.47	20	9.64	11.87	20
Zanthoxylum setulosum	-1.15	2.2	1	6.42	5.93	1
